# Supplementary material for: Symptom Presentation and Access to Medical Care in Patients With Postural Orthostatic Tachycardia Syndrome: Role of Sex
Source: PubMed Central journal article supplement — CJC Open. 2021 Sep 4;3(12 Suppl):S44–52. doi: 10.1016/j.cjco.2021.08.014 (PMC8712580; doi:10.1016/j.cjco.2021.08.014), 2021-09-04
Supplement: mmc1.pdf [file mmc1.pdf]

**Supplemental Table S1. Most common symptoms in female compared to male patients**

| Ranking | Female                   |      | Male                          |      |
|---------|--------------------------|------|-------------------------------|------|
|         | Symptom                  | %    | Symptom                       | %    |
| 1       | Lightheadedness          | 99.0 | Lightheadedness               | 95.3 |
| 2       | Tachycardia              | 97.2 | Tachycardia                   | 93.4 |
| 3       | Headache                 | 94.9 | Difficulty Concentrating      | 92.1 |
| 4       | Difficulty Concentrating | 94.4 | Headache                      | 87.8 |
| 5       | Pre-Syncope              | 94.2 | Pre-Syncope                   | 84.9 |
| 6       | Nausea                   | 90.4 | Memory Problems               | 82.9 |
| 7       | Palpitations             | 88.7 | Palpitations                  | 79.4 |
| 8       | Shortness of Breath      | 88.7 | Shortness of Breath           | 78.5 |
| 9       | Memory Problems          | 88.3 | <b>Trouble Falling Asleep</b> | 77.1 |
| 10      | <b>Muscle Pain</b>       | 84.7 | Nausea                        | 76.0 |

**Supplemental Table S2. Symptoms**

| Symptom                      | Overall |      | Female |      | Male |      | p-value      |
|------------------------------|---------|------|--------|------|------|------|--------------|
|                              | N       | %    | N      | %    | N    | %    |              |
| Lightheadedness              | 7,382   | 98.7 | 6,934  | 99.0 | 448  | 95.3 | <0.001       |
| Tachycardia                  | 7,239   | 97.0 | 6,800  | 97.2 | 439  | 93.4 | <0.001       |
| Headache                     | 7,050   | 94.4 | 6,638  | 94.9 | 412  | 87.8 | <0.001       |
| Difficulty Concentrating     | 7,035   | 94.3 | 6,603  | 94.4 | 432  | 92.1 | <b>0.04</b>  |
| Pre-Syncope                  | 6,989   | 93.6 | 6,591  | 94.2 | 398  | 84.9 | <0.001       |
| Nausea                       | 6,688   | 89.5 | 6,331  | 90.4 | 357  | 76.0 | <0.001       |
| Shortness of Breath          | 6,574   | 88.1 | 6,206  | 88.7 | 368  | 78.5 | <0.001       |
| Palpitation                  | 6,537   | 88.1 | 6,171  | 88.7 | 366  | 79.4 | <0.001       |
| Memory Problems              | 6,552   | 87.9 | 6,165  | 88.3 | 387  | 82.9 | <0.001       |
| Muscle Pains                 | 6,273   | 84.1 | 5,923  | 84.7 | 350  | 74.9 | <0.001       |
| Coldness in the feet         | 6,231   | 83.7 | 5,901  | 84.6 | 330  | 70.2 | <0.001       |
| Stomach Pain                 | 6,233   | 83.5 | 5,882  | 84.1 | 351  | 74.7 | <0.001       |
| Coldness in the hands        | 6,142   | 82.4 | 5,818  | 83.3 | 324  | 69.5 | <0.001       |
| Muscle Weakness              | 6,105   | 82.0 | 5,762  | 82.6 | 343  | 73.1 | <0.001       |
| Trouble falling asleep       | 6,029   | 80.9 | 5,668  | 81.1 | 361  | 77.1 | <b>0.033</b> |
| Bloating                     | 5,960   | 80.2 | 5,692  | 81.7 | 268  | 57.6 | <0.001       |
| Chest Pain                   | 5,857   | 78.6 | 5,527  | 79.1 | 330  | 70.7 | <0.001       |
| Tremulousness                | 5,715   | 76.8 | 5,408  | 77.6 | 307  | 65.3 | <0.001       |
| Trouble staying asleep       | 5,685   | 76.4 | 5377   | 77.1 | 308  | 65.8 | <0.001       |
| Tingling in the hands        | 5,640   | 75.8 | 5,344  | 76.6 | 296  | 63.7 | <0.001       |
| Pain in back of head         | 5,585   | 75.1 | 5,291  | 75.9 | 294  | 63.2 | <0.001       |
| Blurred Vision               | 5,574   | 74.8 | 5,261  | 75.4 | 313  | 66.7 | <0.001       |
| Constipation                 | 5,291   | 71.0 | 5,026  | 72.0 | 265  | 56.7 | <0.001       |
| Color change in feet or legs | 5,267   | 70.9 | 5,008  | 71.9 | 259  | 55.3 | <0.001       |
| Low Blood Pressure           | 5,074   | 69.9 | 4,829  | 71   | 245  | 53.3 | <0.001       |
| Skin Flushing (redness)      | 5,164   | 69.5 | 4,915  | 70.6 | 249  | 53   | <0.001       |
| Diarrhea                     | 5,160   | 69.3 | 4,849  | 69.5 | 311  | 66.3 | 0.147        |
| Frequent Urination           | 5,033   | 67.7 | 4,752  | 68.2 | 281  | 60.2 | <0.001       |
| Tingling in the feet         | 5,026   | 67.6 | 4,747  | 68.1 | 279  | 59.7 | <0.001       |
| Acid Reflux/Heart Burn       | 4,945   | 66.4 | 4,664  | 66.8 | 281  | 60   | <b>0.002</b> |
| Dry mouth                    | 4,868   | 65.4 | 4,577  | 65.6 | 291  | 61.9 | 0.106        |
| Numbness in hands            | 4,823   | 64.9 | 4,561  | 65.5 | 262  | 56.1 | <0.001       |
| Night Sweats                 | 4540    | 61.1 | 4296   | 61.7 | 244  | 52.6 | <0.001       |
| Dry eyes                     | 4,489   | 60.2 | 4,228  | 60.5 | 261  | 55.7 | <b>0.036</b> |
| Numbness in feet             | 4,322   | 58.1 | 4,085  | 58.6 | 237  | 50.7 | <b>0.001</b> |
| Difficulty Speaking          | 3,682   | 49.4 | 3,483  | 49.9 | 199  | 42.3 | <b>0.001</b> |
| Excessive daytime sweating   | 3,590   | 48.4 | 3,378  | 48.6 | 212  | 45.4 | 0.176        |
| Difficulty Swallowing        | 3,460   | 46.5 | 3,284  | 47.1 | 176  | 37.4 | <0.001       |

|                                                  |       |      |       |      |     |      |                  |
|--------------------------------------------------|-------|------|-------|------|-----|------|------------------|
| Burning Sensation (on skin)                      | 3,281 | 44.2 | 3,099 | 44.6 | 182 | 38.9 | <b>0.017</b>     |
| Dry sinuses                                      | 3,194 | 43.2 | 3,008 | 43.4 | 186 | 40.2 | 0.181            |
| Ears turning bright red/warm                     | 3,079 | 41.6 | 2,885 | 41.6 | 194 | 41.5 | 0.996            |
| Tingling in the face                             | 3,008 | 40.5 | 2,862 | 41.1 | 146 | 31.3 | <b>&lt;0.001</b> |
| High Blood Pressure                              | 2,938 | 40.3 | 2,704 | 39.5 | 234 | 50.6 | <i>&lt;0.001</i> |
| Burning in the feet                              | 2,866 | 38.6 | 2,702 | 38.8 | 164 | 35.0 | 0.104            |
| Vomiting                                         | 2,728 | 36.6 | 2,605 | 37.3 | 123 | 26.3 | <b>&lt;0.001</b> |
| Bradycardia                                      | 2,568 | 34.9 | 2,413 | 35.0 | 155 | 33.3 | 0.455            |
| Syncope                                          | 2,581 | 34.6 | 2,460 | 35.2 | 121 | 25.8 | <b>&lt;0.001</b> |
| Double vision                                    | 2,472 | 33.2 | 2,347 | 33.7 | 125 | 26.6 | <b>0.002</b>     |
| Numbness on the face                             | 2,364 | 31.9 | 2,256 | 32.5 | 108 | 23.1 | <b>&lt;0.001</b> |
| Hives elsewhere on body (other than ankles/feet) | 2,344 | 31.6 | 2,250 | 32.3 | 94  | 20.1 | <b>&lt;0.001</b> |
| Burning in the hands                             | 2,280 | 30.8 | 2,161 | 31.1 | 119 | 25.5 | <b>0.012</b>     |
| Choking on drink                                 | 2,132 | 28.6 | 2,037 | 29.2 | 95  | 20.3 | <b>&lt;0.001</b> |
| Choking on saliva                                | 2,103 | 28.3 | 2,022 | 29.0 | 81  | 17.3 | <b>&lt;0.001</b> |
| Lack of sweating                                 | 2,083 | 28.1 | 1,968 | 28.3 | 115 | 24.7 | 0.096            |
| Difficulty Urinating                             | 1,917 | 25.8 | 1,810 | 26.0 | 107 | 22.9 | 0.140            |
| Choking on food                                  | 1,867 | 25.1 | 1,781 | 25.5 | 86  | 18.4 | <b>0.001</b>     |
| Hives around ankles/feet                         | 912   | 12.3 | 865   | 12.4 | 47  | 10.0 | 0.126            |

P Values: **Bold:** A higher proportion of female patients. *Italicized:* a higher proportion of male patients.

**Supplemental Table S3. Comorbid Disorders**

| Comorbid Disorders                                      | Overall |      | Female |      | Male |      | p-value          |
|---------------------------------------------------------|---------|------|--------|------|------|------|------------------|
|                                                         | N       | %    | N      | %    | N    | %    |                  |
| Has a co-morbidity                                      | 6,147   | 84.1 | 5,821  | 85   | 326  | 70.9 | <b>&lt;0.001</b> |
| Migraines                                               | 2,901   | 39.7 | 2,801  | 40.9 | 100  | 21.7 | <b>&lt;0.001</b> |
| Other comorbidity                                       | 2,620   | 35.9 | 2457   | 25.9 | 163  | 35.4 | 0.846            |
| Vitamin D Deficiency                                    | 2,321   | 31.8 | 2,209  | 32.3 | 112  | 24.3 | <b>&lt;0.001</b> |
| Irritable Bowel Syndrome                                | 2,185   | 29.9 | 2,107  | 30.8 | 78   | 17.0 | <b>&lt;0.001</b> |
| Ehlers-Danlos Syndrome                                  | 1,796   | 24.6 | 1,724  | 25.2 | 72   | 15.7 | <b>&lt;0.001</b> |
| Asthma                                                  | 1,540   | 21.1 | 1,472  | 21.5 | 68   | 14.8 | <b>0.001</b>     |
| Chronic Fatigue Syndrome                                | 1,453   | 19.9 | 1,387  | 20.3 | 66   | 14.3 | <b>0.002</b>     |
| Fibromyalgia                                            | 1,367   | 18.7 | 1,330  | 19.4 | 37   | 8    | <b>&lt;0.001</b> |
| Iron Deficiency Anemia                                  | 1,187   | 16.2 | 1,171  | 17.1 | 16   | 3.5  | <b>&lt;0.001</b> |
| Raynaud's Phenomena                                     | 1,159   | 15.9 | 1,133  | 16.5 | 26   | 5.7  | <b>&lt;0.001</b> |
| Vitamin B12 Deficiency                                  | 991     | 13.6 | 965    | 14.1 | 26   | 5.7  | <b>&lt;0.001</b> |
| Gastroparesis                                           | 966     | 13.2 | 942    | 13.8 | 24   | 5.2  | <b>&lt;0.001</b> |
| Inappropriate Sinus Tachycardia                         | 840     | 11.6 | 824    | 12.0 | 26   | 5.7  | <b>&lt;0.001</b> |
| Neurocardiogenic or neurally mediated vasovagal syncope | 831     | 11.4 | 804    | 11.7 | 27   | 5.9  | <b>&lt;0.001</b> |
| Mast Cell Activation Syndrome                           | 777     | 10.6 | 755    | 11.0 | 22   | 4.8  | <b>&lt;0.001</b> |
| Endometriosis                                           | 702     | 9.6  | 702    | 10.3 | -    | -    | -                |
| Mitral Valve Prolapse                                   | 612     | 8.4  | 594    | 8.7  | 18   | 3.9  | <b>&lt;0.001</b> |
| Autonomic Neuropathy                                    | 570     | 7.8  | 542    | 7.9  | 28   | 6.1  | 0.157            |
| Sleep Apnea                                             | 561     | 7.7  | 497    | 7.3  | 64   | 13.9 | <i>&lt;0.001</i> |
| Peripheral Neuropathy                                   | 496     | 6.8  | 467    | 6.8  | 29   | 6.3  | 0.670            |
| Small Fiber Neuropathy                                  | 483     | 6.6  | 455    | 6.6  | 28   | 6.1  | 0.641            |
| Gallbladder Disease                                     | 474     | 6.5  | 463    | 6.8  | 11   | 2.4  | <b>&lt;0.001</b> |
| Hashimoto's Thyroiditis                                 | 421     | 5.8  | 420    | 6.1  | 1    | 0.2  | <b>&lt;0.001</b> |

|                                                             |     |     |     |     |    |     |              |
|-------------------------------------------------------------|-----|-----|-----|-----|----|-----|--------------|
| Hypokalemia                                                 | 416 | 5.7 | 405 | 5.9 | 11 | 2.4 | <b>0.002</b> |
| Other Connective Tissue Disorder                            | 350 | 4.8 | 335 | 4.9 | 15 | 3.3 | 0.113        |
| Celiac Disease                                              | 275 | 3.8 | 264 | 3.9 | 11 | 2.4 | 0.11         |
| Epstein Barr Virus (active infection)                       | 272 | 3.7 | 259 | 3.8 | 13 | 2.8 | 0.294        |
| Lyme Disease                                                | 249 | 3.4 | 239 | 2.5 | 10 | 2.2 | 0.132        |
| Reflex Sympathetic Dystrophy/Complex Regional Pain Syndrome | 234 | 3.2 | 223 | 3.3 | 11 | 2.4 | 0.307        |
| Chiari Malformation                                         | 223 | 3.1 | 218 | 3.2 | 5  | 1.1 | <b>0.011</b> |
| Sjoren's Syndrome                                           | 221 | 3.0 | 215 | 3.1 | 6  | 1.3 | <b>0.026</b> |
| Livedo Reticularis                                          | 216 | 3.0 | 210 | 3.1 | 6  | 1.3 | <b>0.031</b> |
| Anorexia Nervosa/Bulemia                                    | 204 | 2.8 | 199 | 2.9 | 5  | 1.1 | <b>0.022</b> |
| Rheumatoid Arthritis                                        | 169 | 2.3 | 164 | 2.4 | 5  | 1.1 | 0.071        |
| Mononucleosis (active infection)                            | 162 | 2.2 | 156 | 2.3 | 6  | 1.3 | 0.170        |
| Cancer                                                      | 156 | 2.1 | 148 | 2.2 | 8  | 1.7 | 0.544        |
| Epilepsy                                                    | 148 | 2.0 | 141 | 2.1 | 7  | 1.5 | 0.428        |
| Sensory Neuropathy                                          | 135 | 1.8 | 130 | 1.9 | 5  | 1.1 | 0.211        |
| Atrial Fibrillation                                         | 135 | 1.8 | 125 | 1.8 | 10 | 2.2 | 0.591        |
| Lupus                                                       | 127 | 1.7 | 124 | 1.8 | 3  | 0.7 | 0.066        |
| Type II Diabetes                                            | 114 | 1.6 | 105 | 1.5 | 9  | 2.0 | 0.479        |
| CoQ10 Deficiency                                            | 102 | 1.4 | 97  | 1.4 | 5  | 1.1 | 0.560        |
| Heart Block                                                 | 74  | 1.0 | 66  | 1.0 | 8  | 1.7 | 0.108        |
| Pure Autonomic Failure                                      | 62  | 0.8 | 59  | 0.9 | 3  | 0.7 | 0.635        |
| Grave's Disease                                             | 55  | 0.8 | 55  | 0.8 | 0  | 0.0 | 0.054        |
| Heavy Metal Poisoning                                       | 54  | 0.7 | 52  | 0.8 | 2  | 0.4 | 0.431        |
| Addison's Disease                                           | 53  | 0.7 | 51  | 0.7 | 2  | 0.4 | 0.448        |
| Leiden Factor V                                             | 51  | 0.7 | 48  | 0.7 | 3  | 0.7 | 0.903        |
| Type I Diabetes                                             | 46  | 0.6 | 44  | 0.6 | 2  | 0.4 | 0.585        |
| Vasculitis                                                  | 45  | 0.6 | 42  | 0.6 | 3  | 0.7 | 0.918        |
| Mastocytosis                                                | 39  | 0.5 | 38  | 0.6 | 1  | 0.2 | 0.336        |
| Motor Neuropathy                                            | 33  | 0.5 | 30  | 0.4 | 3  | 0.7 | 0.508        |
| Idiopathic Thrombocytopenia Pupura                          | 32  | 0.4 | 30  | 0.4 | 2  | 0.4 | 0.992        |
| Alcoholism                                                  | 29  | 0.4 | 26  | 0.4 | 3  | 0.7 | 0.368        |

|                                  |    |            |    |            |   |     |                     |
|----------------------------------|----|------------|----|------------|---|-----|---------------------|
| Multiple Sclerosis               | 27 | <b>0.4</b> | 26 | <b>0.4</b> | 1 | 0.2 | <b>0.579</b>        |
| Myasthenia Gravis                | 22 | <b>0.3</b> | 22 | <b>0.3</b> | 0 | 0.0 | <b>0.223</b>        |
| Autoimmune<br>Pancreatitis       | 21 | <b>0.3</b> | 20 | <b>0.3</b> | 1 | 0.2 | <b>0.772</b>        |
| Diabetes Insipidus               | 18 | <b>0.2</b> | 18 | <b>0.3</b> | 0 | 0.0 | <b>0.271</b>        |
| Delta Storage Pool<br>Deficiency | 16 | <b>0.2</b> | 16 | <b>0.2</b> | 0 | 0.0 | <b>0.299</b>        |
| Multiple System<br>Atrophy       | 16 | <b>0.2</b> | 15 | <b>0.2</b> | 1 | 0.2 | <b>0.994</b>        |
| Autoimmune<br>Hepatitis          | 12 | <b>0.2</b> | 11 | <b>0.2</b> | 1 | 0.2 | <b>0.771</b>        |
| Bechet's Disease                 | 12 | <b>0.2</b> | 11 | <b>0.2</b> | 1 | 0.2 | <b>0.771</b>        |
| Conn's Syndrome                  | 9  | <b>0.1</b> | 8  | <b>0.1</b> | 1 | 0.2 | <b>0.552</b>        |
| Parkinson's Disease              | 6  | <b>0.1</b> | 5  | <b>0.1</b> | 1 | 0.2 | <b>0.295</b>        |
| Hepatitis C                      | 5  | <b>0.1</b> | 5  | <b>0.1</b> | 0 | 0.0 | <b>0.562</b>        |
| Fabry's Disease                  | 2  | <b>0.0</b> | 1  | <b>0.0</b> | 1 | 0.2 | <b><i>0.011</i></b> |

P Values: **Bold:** A higher proportion of female patients. *Italicized:* a higher proportion of male patients

**Supplemental Table S4A. Medications**

| Medication               | Overall |      | Female |      | Male |      | p-value      |
|--------------------------|---------|------|--------|------|------|------|--------------|
|                          | N       | %    | N      | %    | N    | %    |              |
| Beta Blockers            | 3,200   | 41.8 | 3,023  | 42.1 | 177  | 37.0 | <b>0.028</b> |
| Florinef                 | 1,991   | 26.0 | 1,859  | 25.9 | 132  | 27.7 | 0.388        |
| Midodrine                | 1,815   | 23.8 | 1,716  | 24.0 | 99   | 20.8 | 0.112        |
| Benzodiazepines          | 1,810   | 23.7 | 1,717  | 24   | 93   | 19.5 | <b>0.024</b> |
| SSRI                     | 1,576   | 20.6 | 1,497  | 20.9 | 79   | 16.5 | <b>0.020</b> |
| SNRI                     | 1,332   | 17.5 | 1,264  | 17.7 | 68   | 14.2 | 0.052        |
| Amphetamine              | 722     | 9.5  | 670    | 9.4  | 52   | 10.9 | 0.278        |
| Pyridostigmine           | 543     | 7.1  | 505    | 7.1  | 38   | 7.9  | 0.465        |
| Ivabradine               | 509     | 6.7  | 481    | 6.7  | 28   | 5.9  | 0.455        |
| Pseudoephedrine          | 416     | 5.5  | 395    | 5.5  | 21   | 4.4  | 0.297        |
| Clonidine/Catapres       | 346     | 4.5  | 316    | 4.4  | 30   | 6.3  | 0.061        |
| Calcium Channel Blockers | 299     | 3.9  | 280    | 3.9  | 19   | 4    | 0.942        |
| Modafinil/Armodafinil    | 274     | 3.6  | 260    | 3.6  | 14   | 2.0  | 0.419        |
| Ritalin                  | 294     | 2.9  | 270    | 3.81 | 24   | 5.0  | 0.175        |
| Desmopressin             | 170     | 2.2  | 153    | 2.1  | 17   | 3.6  | <i>0.040</i> |
| Dextroamphetamine        | 163     | 2.1  | 148    | 2.1  | 15   | 3.2  | 0.113        |
| Alpha-methyldopa/Aldomet | 36      | 0.5  | 33     | 0.5  | 3    | 0.6  | 0.611        |
| Octreotide               | 37      | 0.5  | 35     | 0.5  | 2    | 0.4  | 0.827        |

P Values: **Bold:** A higher proportion of female patients. *Italicized:* a higher proportion of male patients

**Supplemental Table S4B. Non-Pharmacological Treatments**

| Non-Pharmacological Treatment | Overall |      | Female |      | Male |      | p-value          |
|-------------------------------|---------|------|--------|------|------|------|------------------|
|                               | N       | %    | N      | %    | N    | %    |                  |
| Increased Dietary Salt        | 7,277   | 91.4 | 6,854  | 91.8 | 423  | 85.1 | <b>&lt;0.001</b> |
| Vitamins                      | 5,511   | 72.1 | 5,199  | 72.5 | 312  | 64.9 | <b>&lt;0.001</b> |
| Compression Garments          | 4,352   | 57.0 | 4,162  | 58.1 | 190  | 39.6 | <b>&lt;0.001</b> |
| Salt Supplements              | 2,867   | 37.5 | 2,699  | 37.7 | 168  | 35.1 | 0.271            |
| Electrolyte Supplements       | 2,404   | 31.5 | 2,281  | 31.9 | 123  | 25.7 | <b>0.005</b>     |
| Herbs                         | 1,488   | 19.5 | 1,417  | 19.8 | 71   | 14.9 | <b>0.009</b>     |
| Ablation                      | 336     | 4.4  | 318    | 4.4  | 18   | 3.8  | 0.482            |
| IVIG                          | 150     | 2.0  | 140    | 2.0  | 10   | 2.1  | 0.838            |
| Pacemaker                     | 143     | 1.9  | 135    | 1.9  | 8    | 1.7  | 0.724            |
| Recombinant EPO               | 24      | 0.3  | 22     | 0.3  | 2    | 0.4  | 0.674            |

P Values: **Bold:** A higher proportion of female patients. *Italicized:* a higher proportion of male patients
